# Supplementary material for: Characterization of the Castanopsis carlesii Deadwood Mycobiome by Pacbio Sequencing of the Full-Length Fungal Nuclear Ribosomal Internal Transcribed Spacer (ITS)
Source: PubMed Central journal article supplement (PMC6540943; doi:10.3389/fmicb.2019.00983), 2019-05-17

## **Supplementary materials**

# **Characterization of the *Castanopsis carlesii* deadwood mycobiome by Pacbio sequencing of the full-length fungal nuclear ribosomal internal transcribed spacer (ITS)**

### **Author names:**

Witoon Purahong<sup>1</sup>, Ausana Mapook<sup>1,2</sup>, Yu-Ting Wu<sup>3</sup>, Chaur-Tzuhn Chen<sup>3</sup>

### **Affiliations:**

<sup>1</sup>Department of Soil Ecology, UFZ-Helmholtz Centre for Environmental Research, Theodor-Lieser-Str. 4, D-06120 Halle (Saale), Germany; <sup>2</sup>Center of Excellence in Fungal Research, Mae Fah Luang University, Chiang Rai 57100, Thailand, <sup>3</sup>Department of Forestry, National Pingtung University of Science and Technology, Pingtung, Taiwan

**Figure S1.** Information on detected observed OTU richness (a) and similarity (b) of community composition in *Castanopsis carlesii* deadwood mycobiomes subjected to different bioinformatics parameters (rarified and non-rarified datasets/and rare OTUs included/removed).

**a**

| Parameter                                   | Detected OTU richness                                                              |     |
|---------------------------------------------|------------------------------------------------------------------------------------|-----|
| All                                         |  | 441 |
| Singletons removed                          |  | 228 |
| Singletons to tripletons removed            |   | 127 |
| Rarify                                      |  | 284 |
| Rarify and singletons removed               |   | 124 |
| Rarify and singletons to tripletons removed |   | 68  |

**b**

| Parameter                                   | Bray-Curtis similarity                                                              |      | Jaccard similarity                                                                    |      |
|---------------------------------------------|-------------------------------------------------------------------------------------|------|---------------------------------------------------------------------------------------|------|
| Replicate: 1 and 2                          |                                                                                     |      |                                                                                       |      |
| All                                         |    | 0.39 |    | 0.28 |
| Singletons removed                          |    | 0.40 |    | 0.50 |
| Singletons to tripletons removed            |    | 0.40 |    | 0.69 |
| Rarify                                      |    | 0.38 |    | 0.30 |
| Rarify and singletons removed               |    | 0.39 |    | 0.61 |
| Rarify and singletons to tripletons removed |    | 0.39 |    | 0.79 |
| Replicate: 1 and 3                          |                                                                                     |      |                                                                                       |      |
| All                                         |   | 0.30 |   | 0.29 |
| Singletons removed                          |  | 0.30 |  | 0.45 |
| Singletons to tripletons removed            |  | 0.30 |  | 0.57 |
| Rarify                                      |  | 0.30 |  | 0.23 |
| Rarify and singletons removed               |  | 0.30 |  | 0.43 |
| Rarify and singletons to tripletons removed |  | 0.31 |  | 0.63 |
| Replicate: 2 and 3                          |                                                                                     |      |                                                                                       |      |
| All                                         |  | 0.16 |  | 0.24 |
| Singletons removed                          |  | 0.16 |  | 0.43 |
| Singletons to tripletons removed            |  | 0.16 |  | 0.61 |
| Rarify                                      |  | 0.16 |  | 0.23 |
| Rarify and singletons removed               |  | 0.16 |  | 0.41 |
| Rarify and singletons to tripletons removed |  | 0.16 |  | 0.60 |

**Figure S2.** ITS sizes and their distribution of the representative sequences of *Castanopsis carlesii* deadwood mycobiomes.

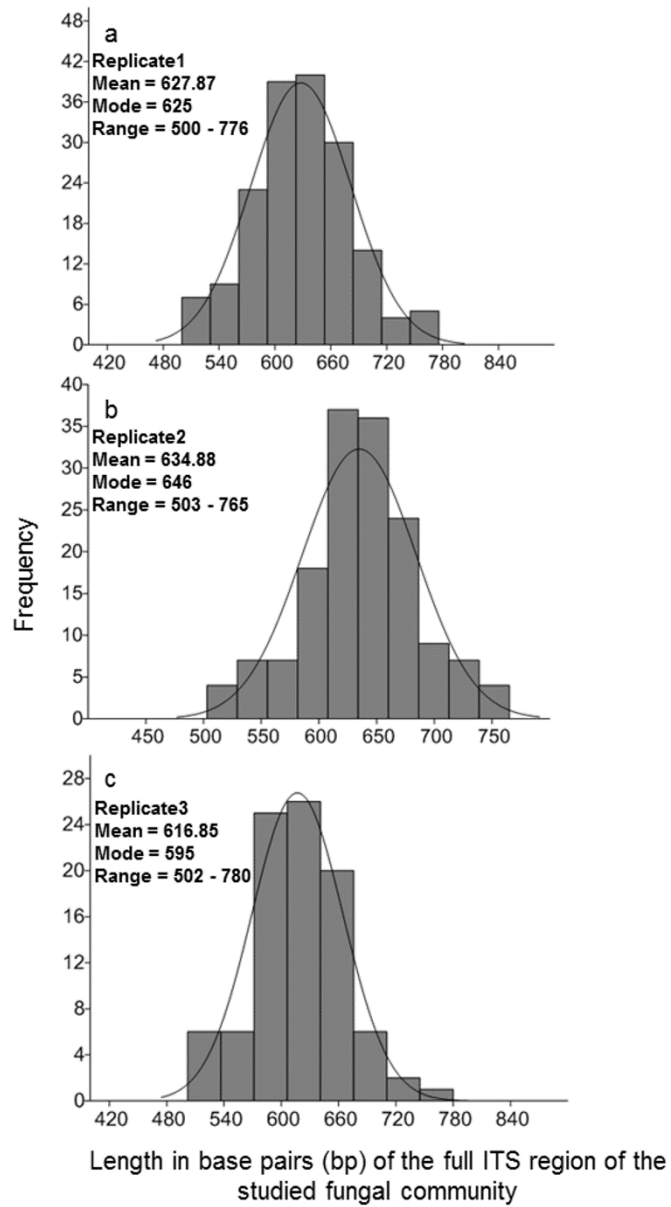

**Figure S3.** Rarefaction curves of rarified datasets using all OTUs (left panel) and all OTUs detected at least two sequences (right panel).

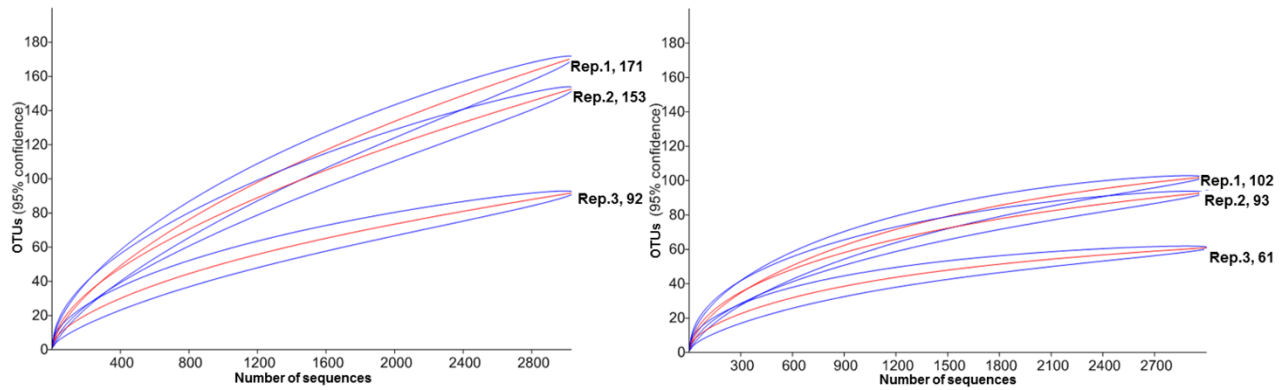

**Figure S4.** Phylograms of *Alternaria alternata* (Dothideomycetes) generated by Randomized Axelerated Maximum Likelihood (RAXML) analysis based on complete internal transcribed spacer (ITS) sequences.

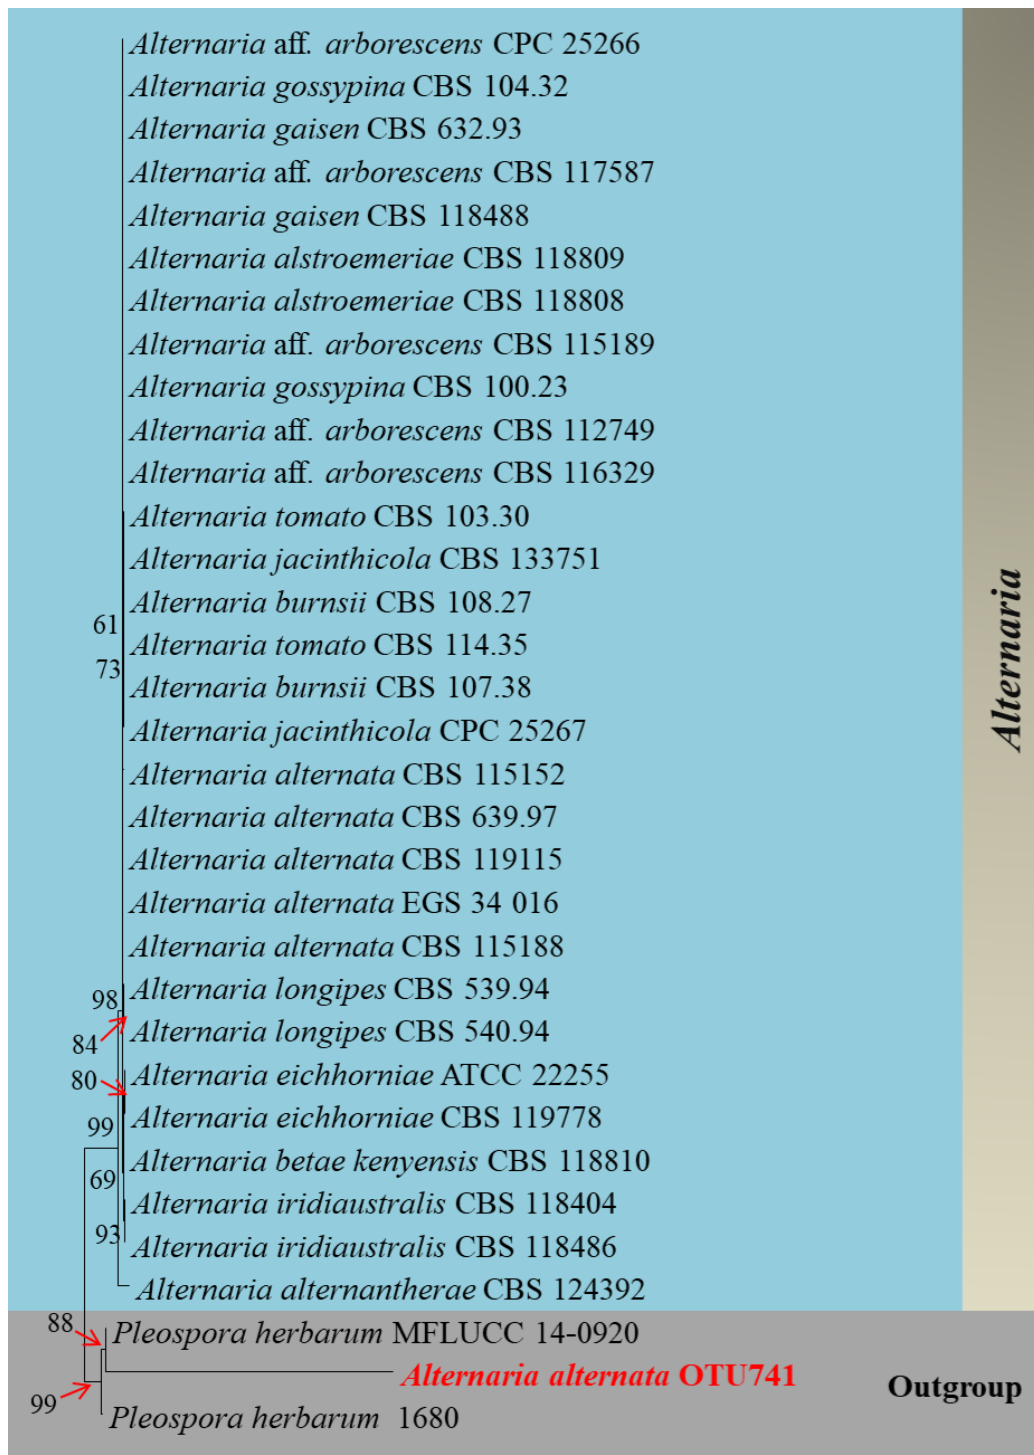

—  
0.09

**Figure S5.** Phylograms of *Scytalidium lignicola* (Leotiomyces) generated from Randomized Axelerated Maximum Likelihood (RAxML) analysis based on complete internal transcribed spacer (ITS) sequences.

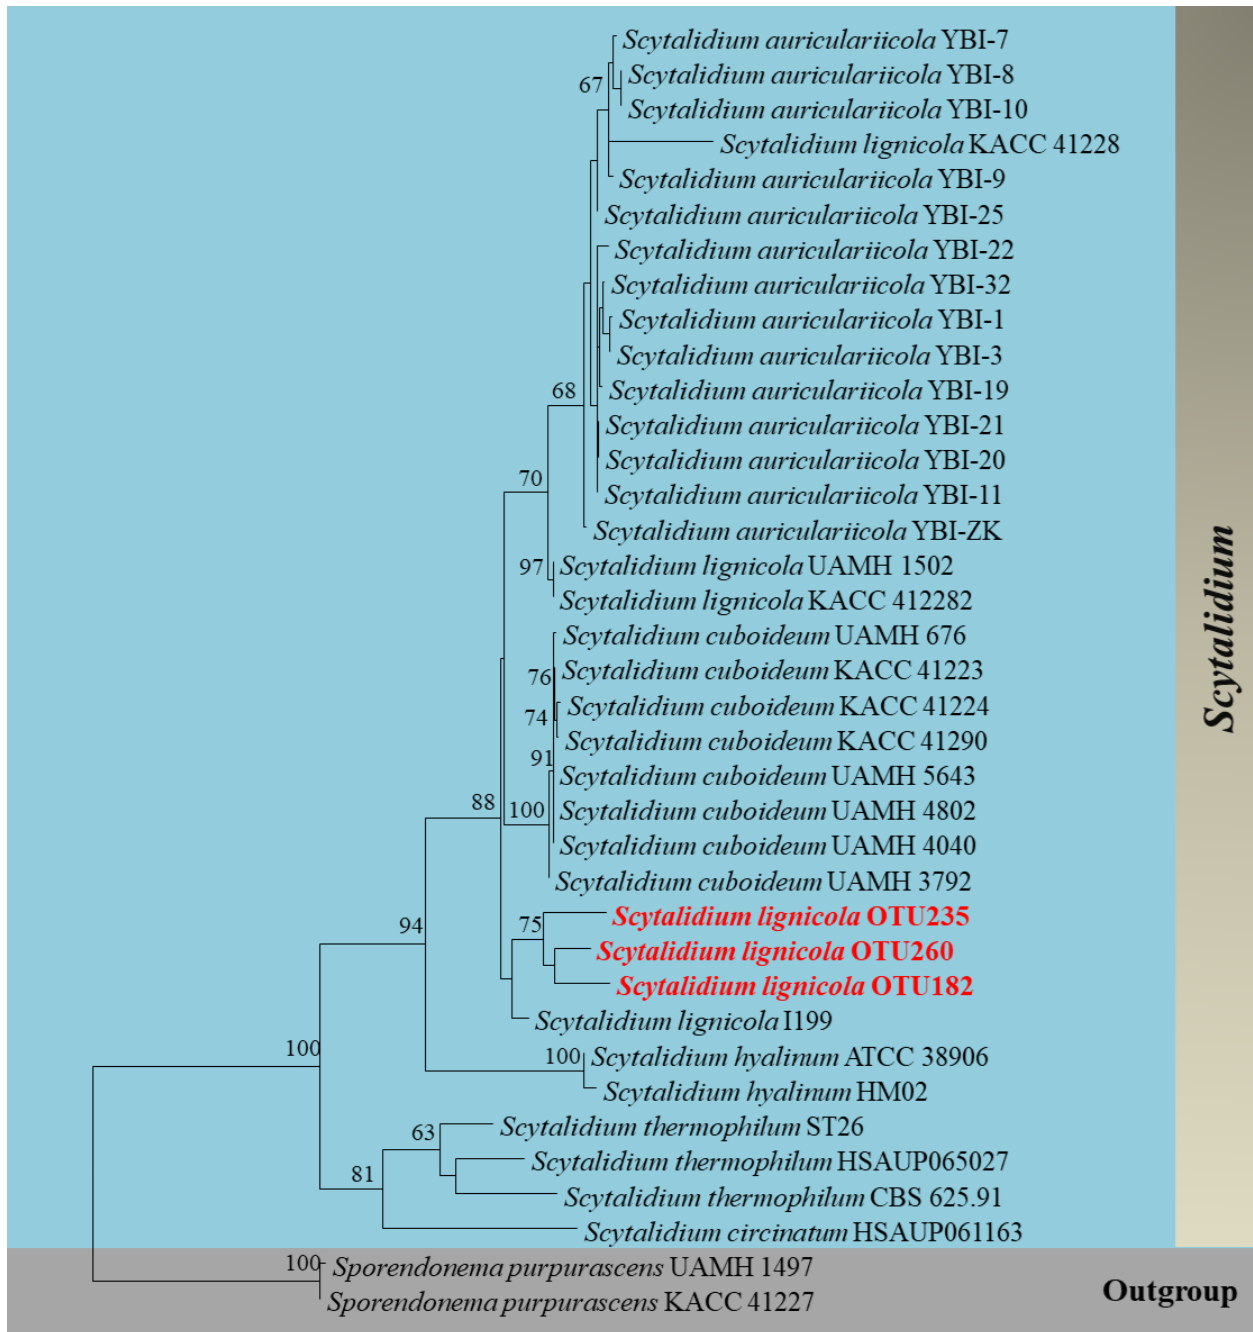

**Figure S6.** Phylograms of *Meliniomyces bicolor* (Leotiomyces) generated from Randomized Axelerated Maximum Likelihood (RAxML) analysis based on complete internal transcribed spacer (ITS) sequences.

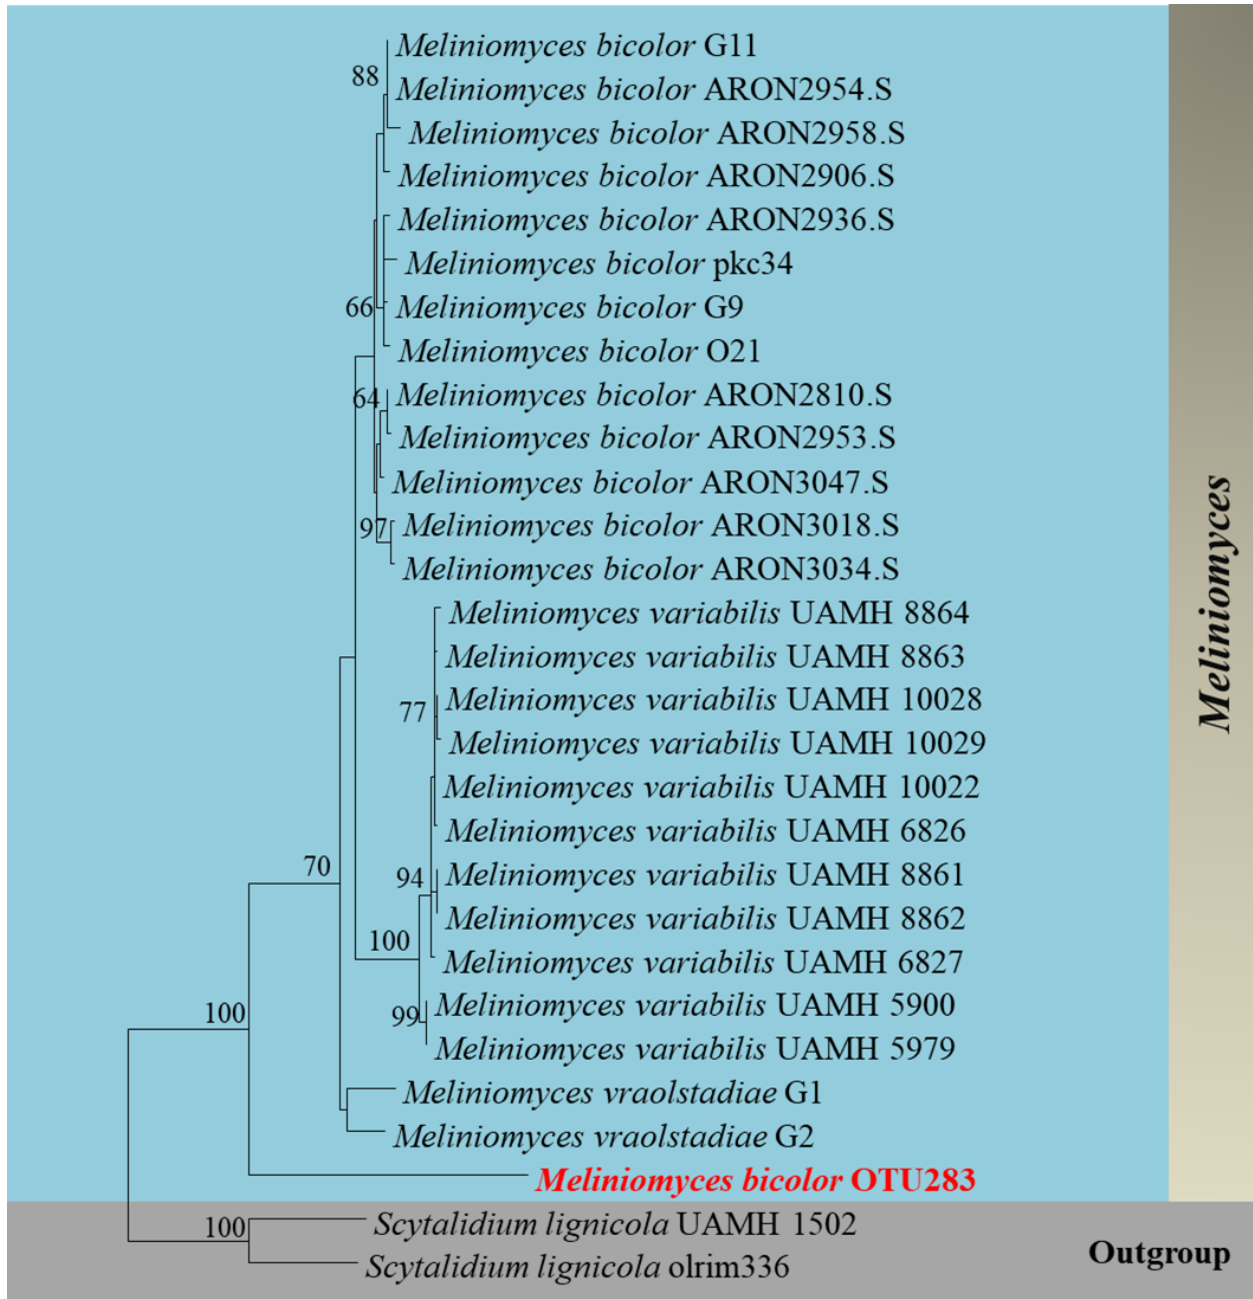

—  
0.03

**Figure S7.** Phylograms of *Sugiyamaella novakii* (Saccharomycetes) generated from Randomized Axelerated Maximum Likelihood (RAxML) analysis based on complete internal transcribed spacer (ITS) sequences.

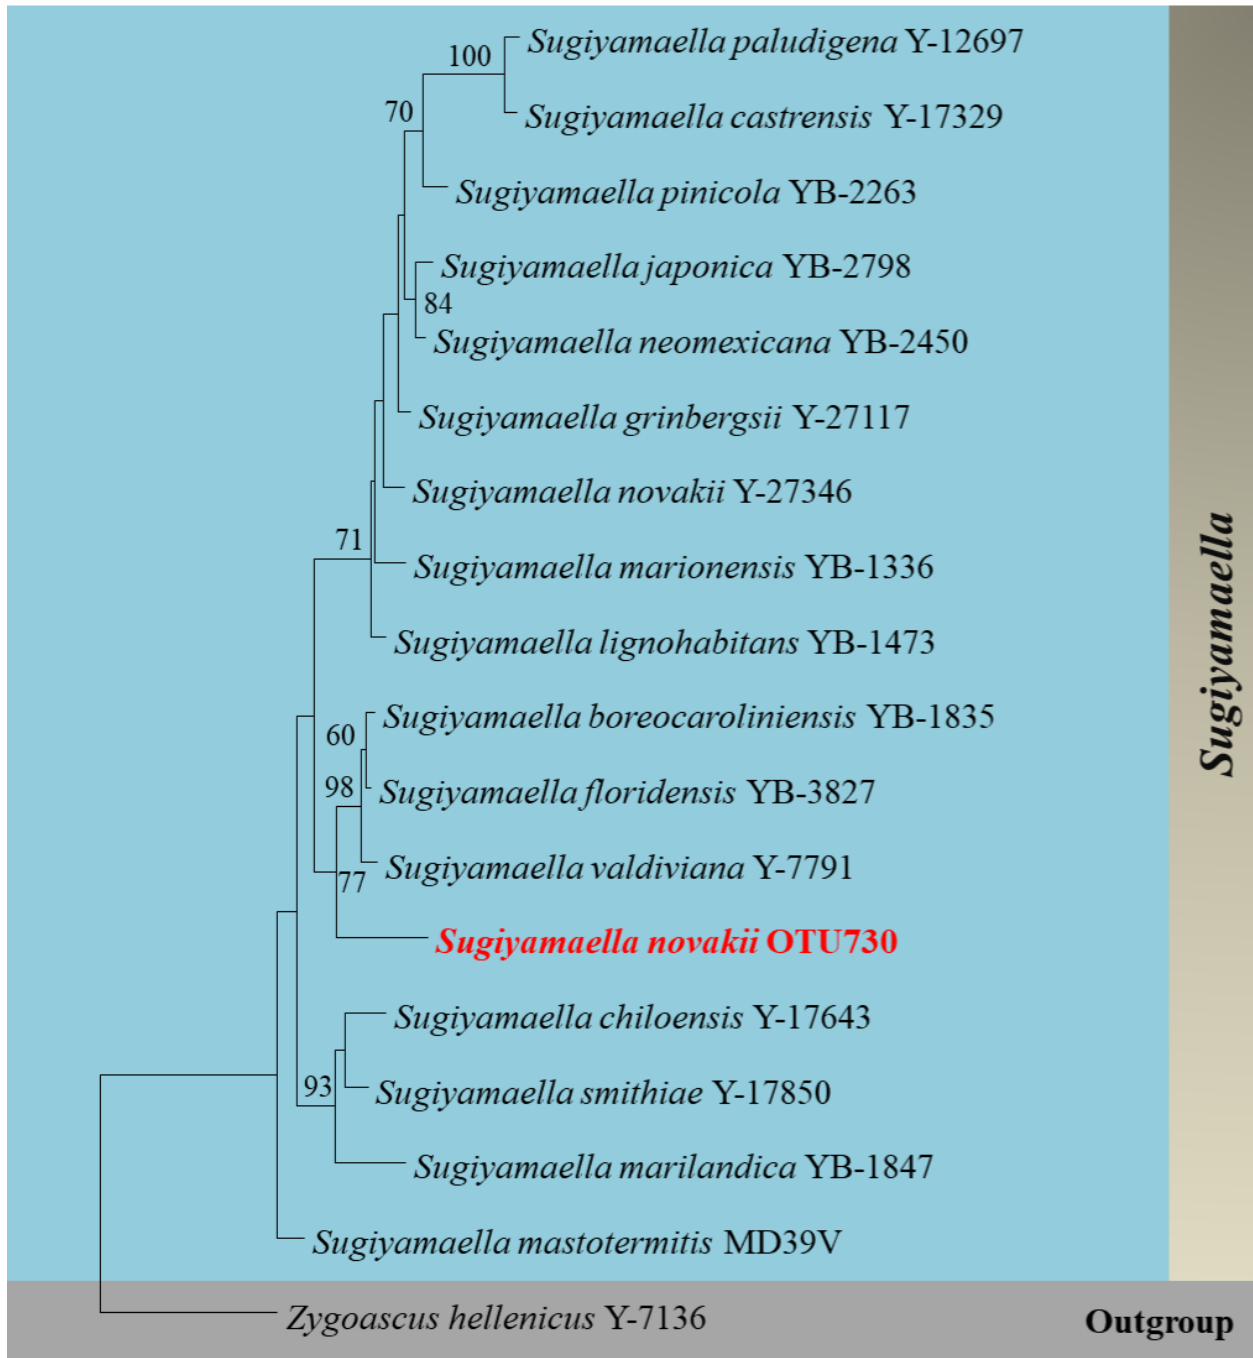



**Figure S8.** Phylograms of *Hawksworthiomyces crousii* (Sordariomycetes) generated from Randomized Axelerated Maximum Likelihood (RAxML) analysis based on complete internal transcribed spacer (ITS) sequences.

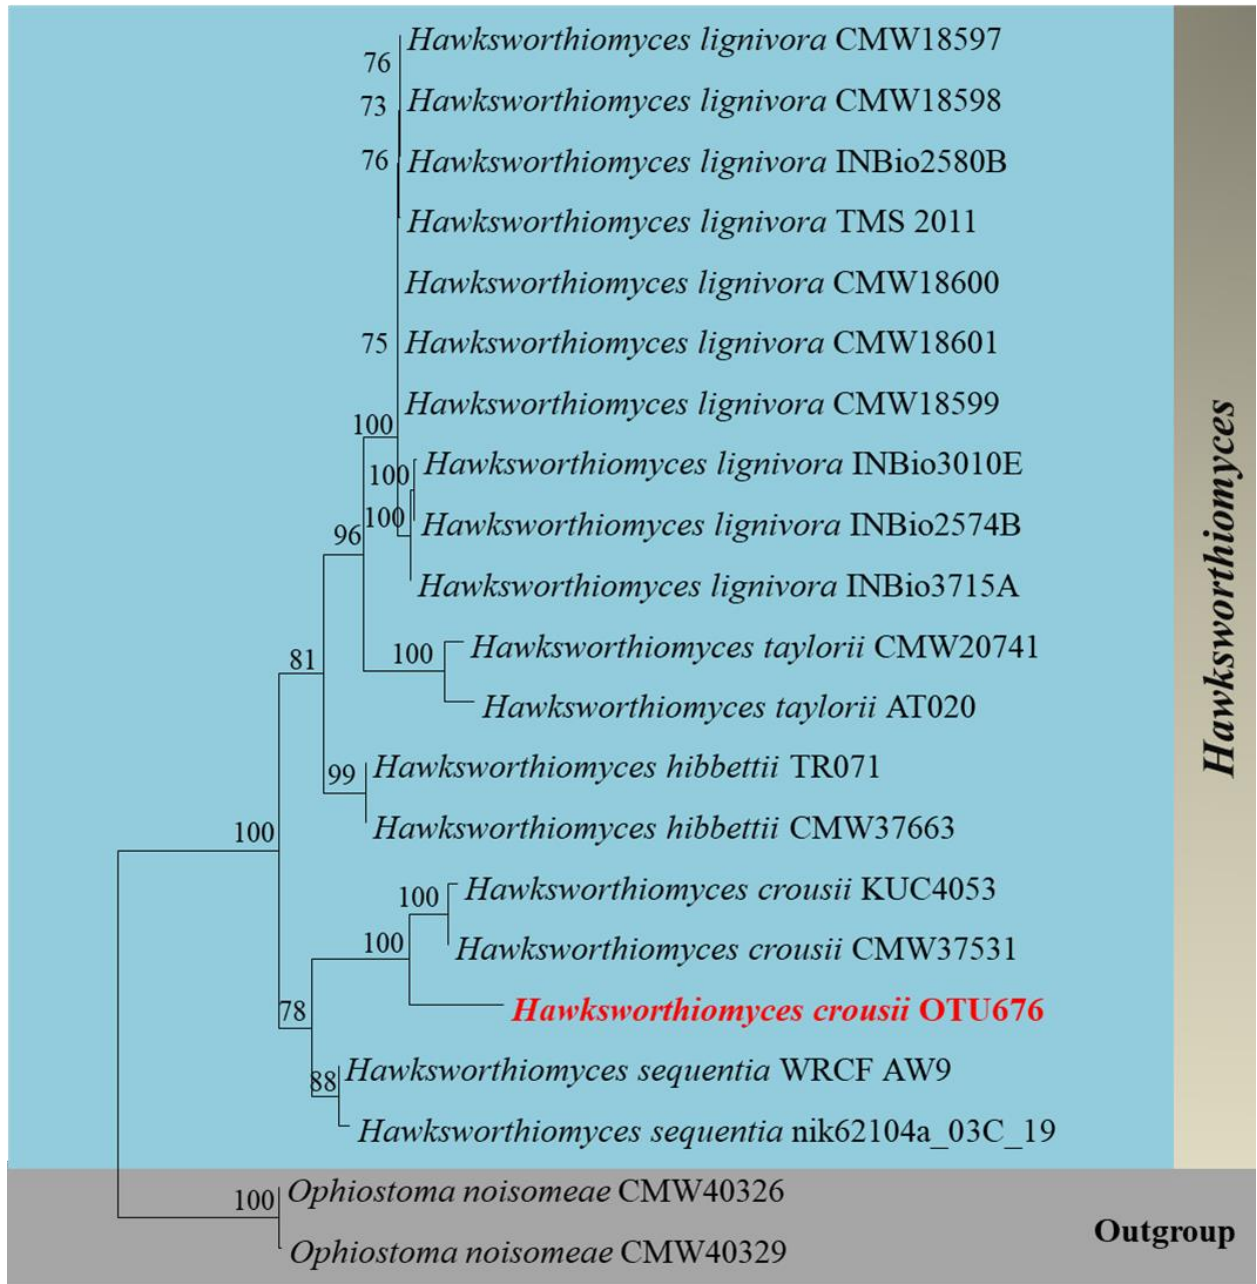

—  
0.04

**Figure S9.** Phylograms of *Pestalotiopsis maculiformans* (Sordariomycetes) generated from Randomized Axelerated Maximum Likelihood (RAxML) analysis based on complete internal transcribed spacer (ITS) sequences.

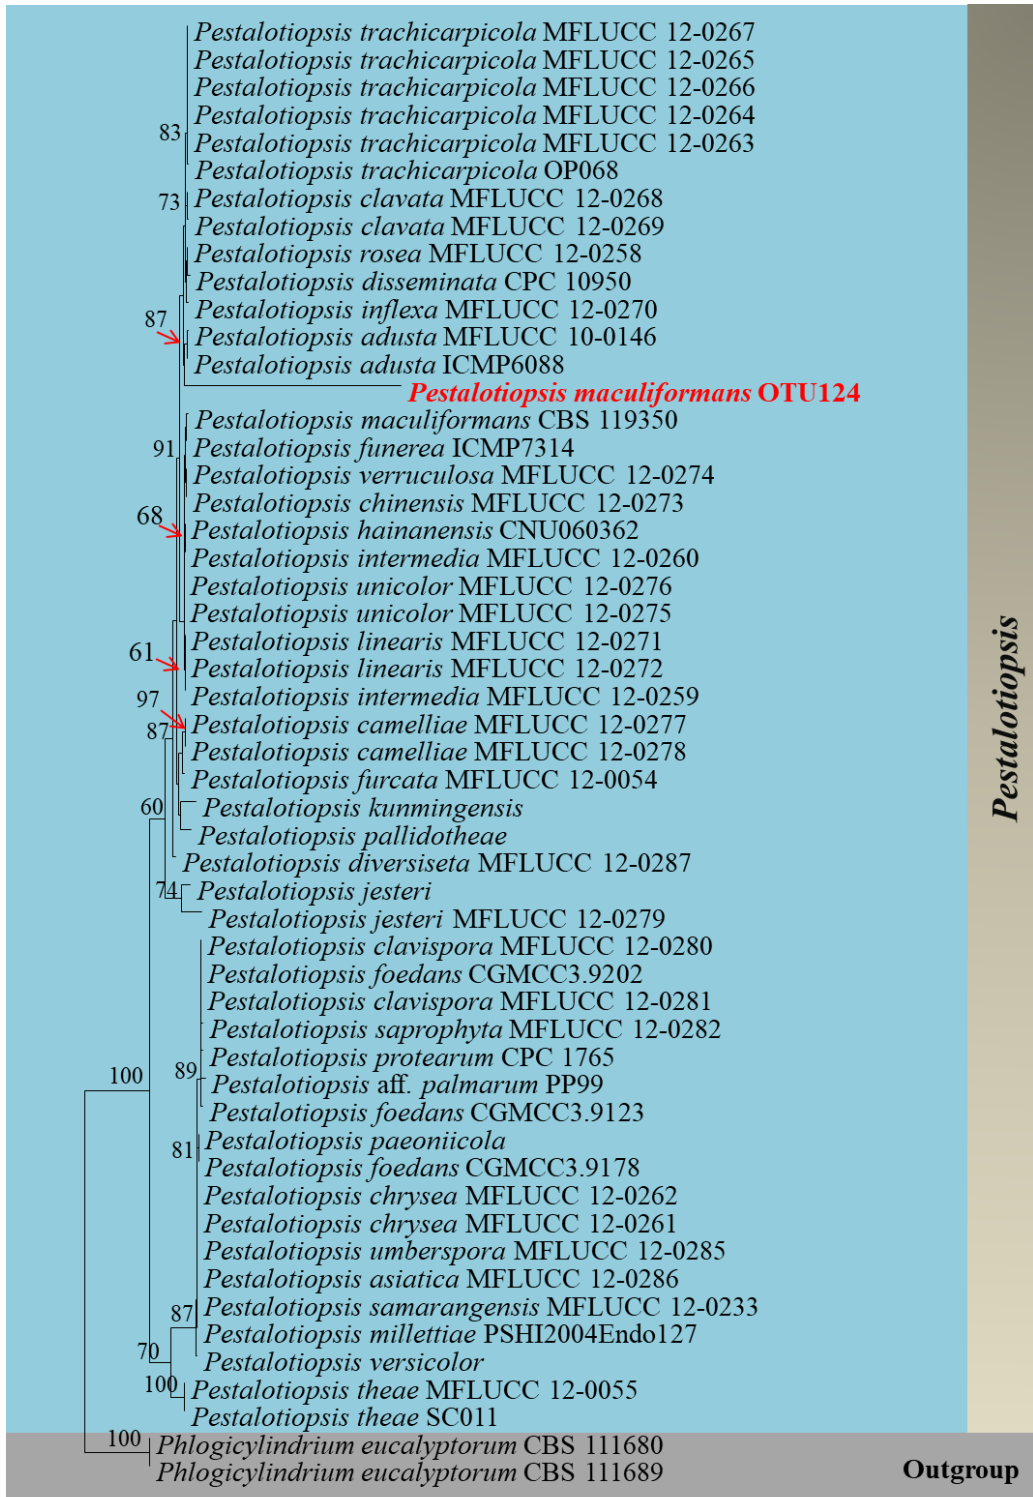

0.06

**Figure S10.** Phylograms of *Trichoderma harzianum* and *Trichoderma virens* (Sordariomycetes) generated from Randomized Axelerated Maximum Likelihood (RAxML) analysis based on complete internal transcribed spacer (ITS) sequences.

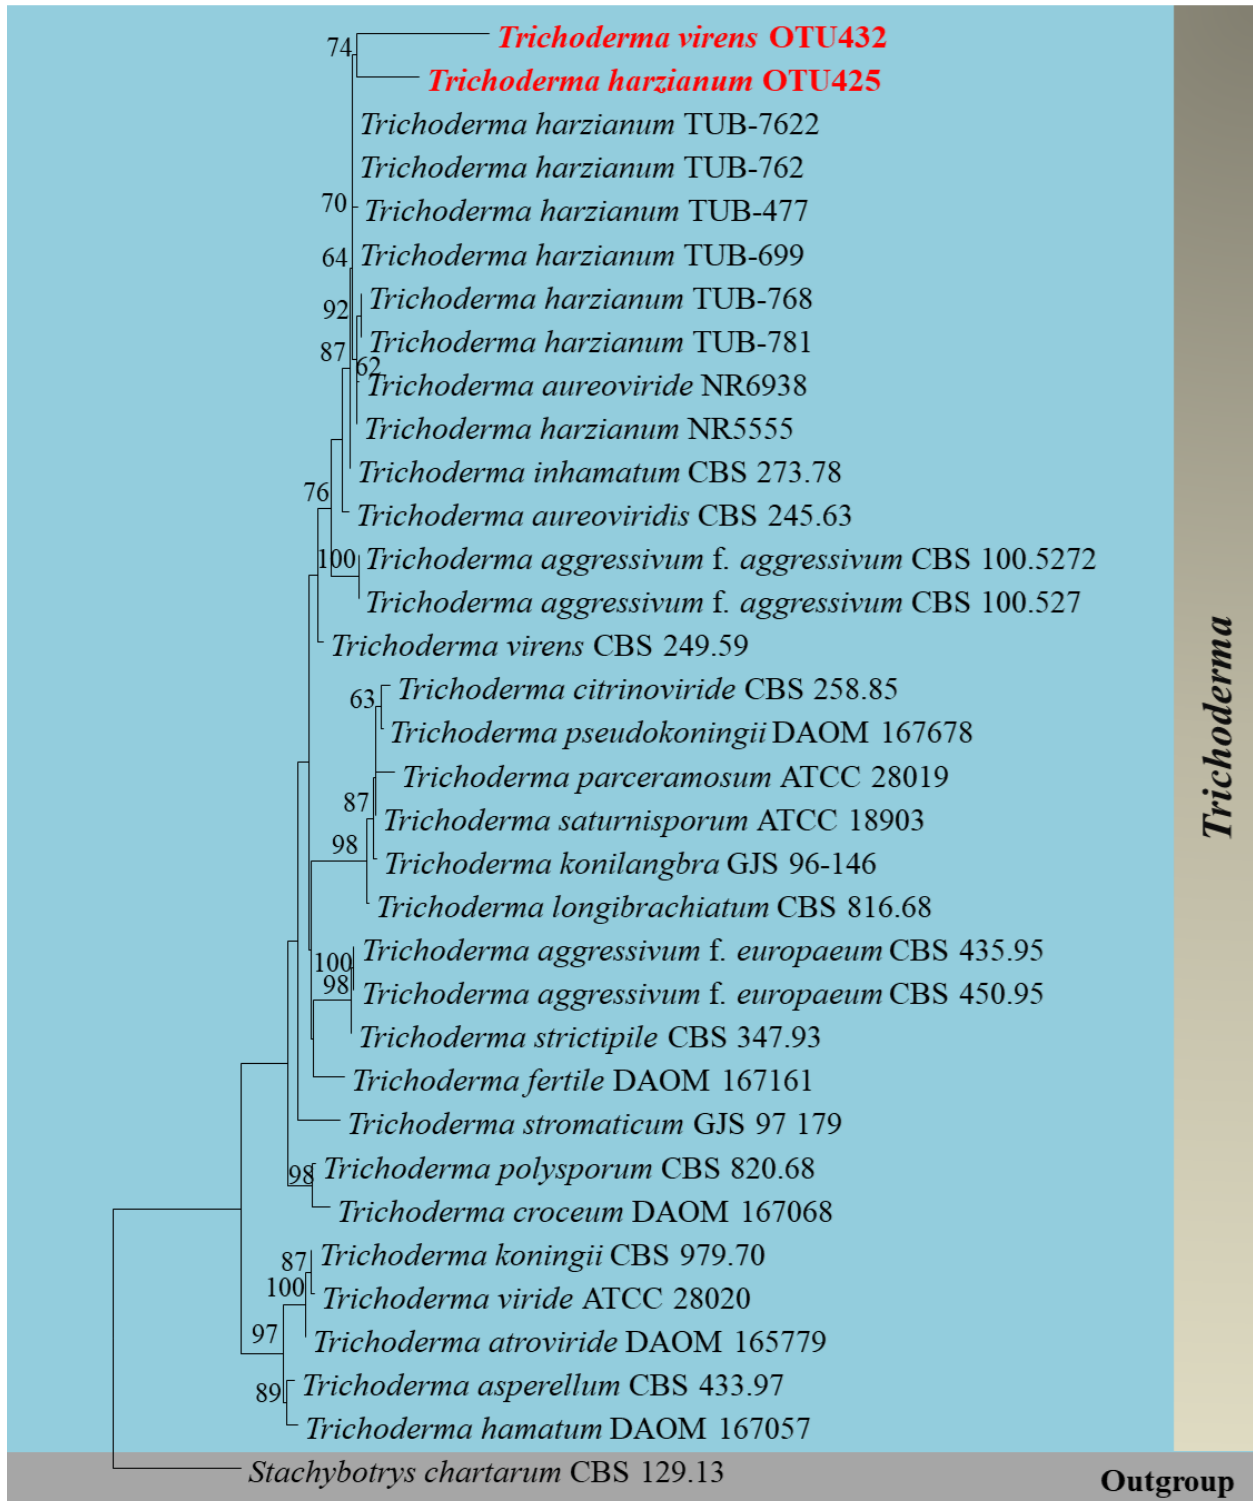

0.04

**Figure S11.** Phylograms of *Dictyochaeta simplex* (Sordariomycetes) generated from Randomized Axelerated Maximum Likelihood (RAxML) analysis based on complete internal transcribed spacer (ITS) sequences.

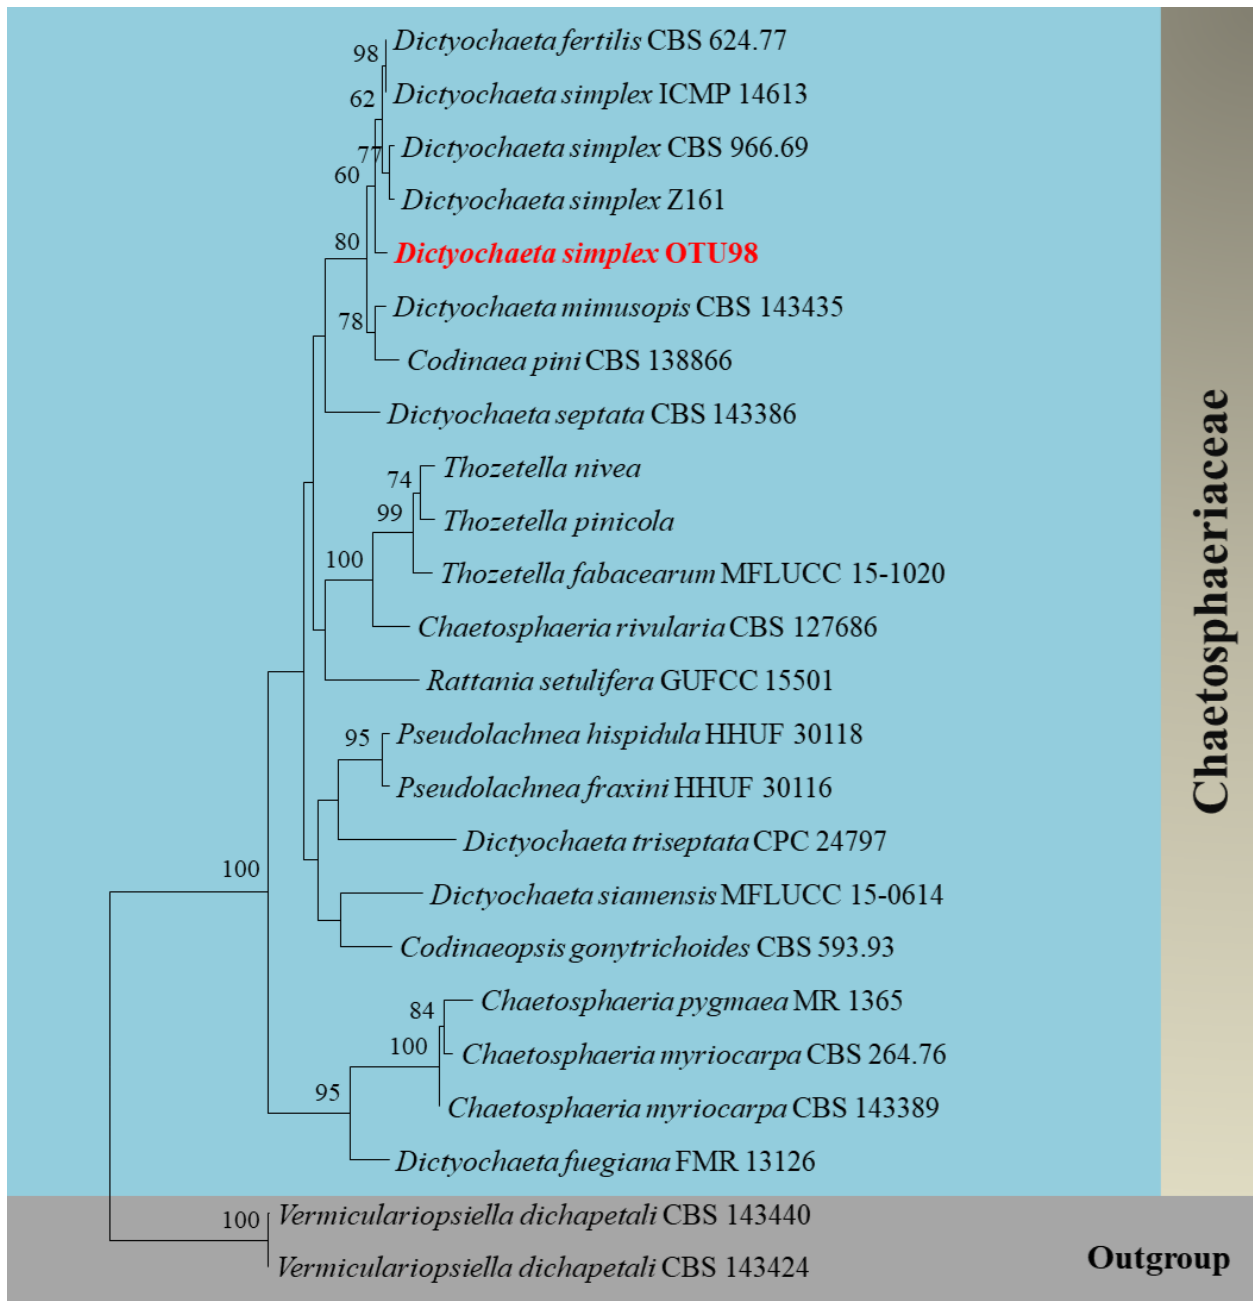

0.06

**Figure S12.** Phylograms of *Subulicystidium perlongisporum* and *Sistotremastrum guttuliferum* (Agaricomycetes, Trechisporales) generated from Randomized Axelerated Maximum Likelihood (RAxML) analysis based on complete internal transcribed spacer (ITS) sequences.

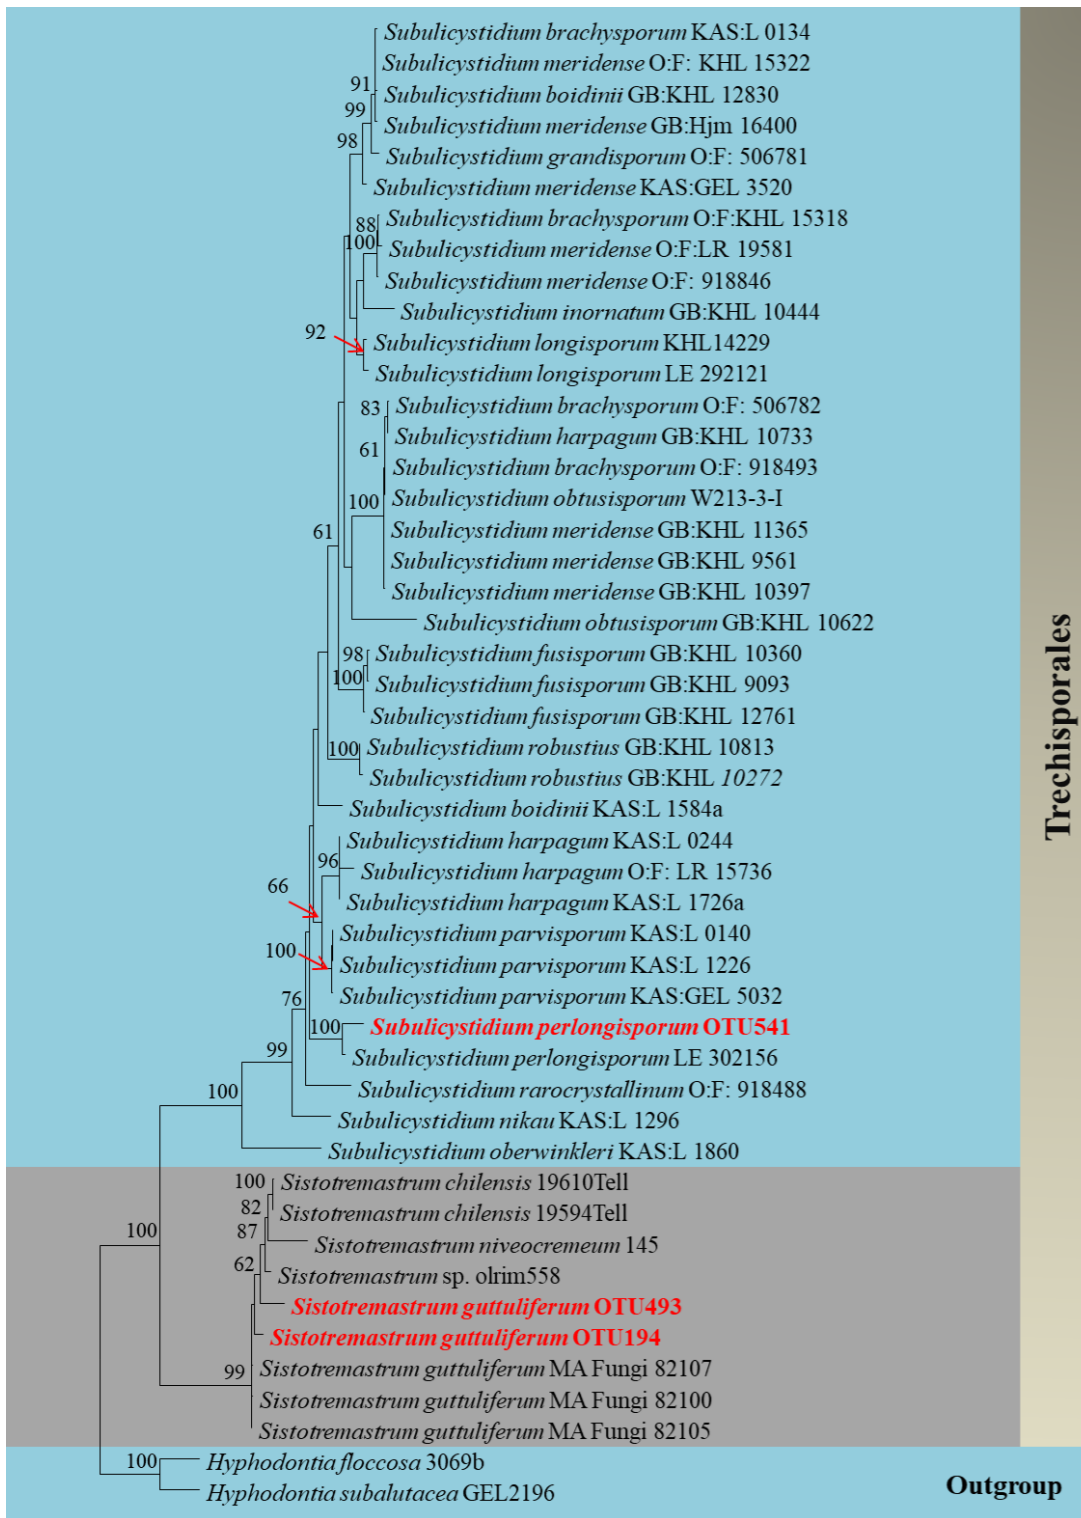

**Figure S13.** Phylograms of *Dichomitus squalens*, *Porogramme albocincta* and *Tinctoporellus epimiltinus* (Agaricomycetes, Polyporales) generated from Randomized Axelerated Maximum Likelihood (RAxML) analysis based on complete internal transcribed spacer (ITS) sequences.

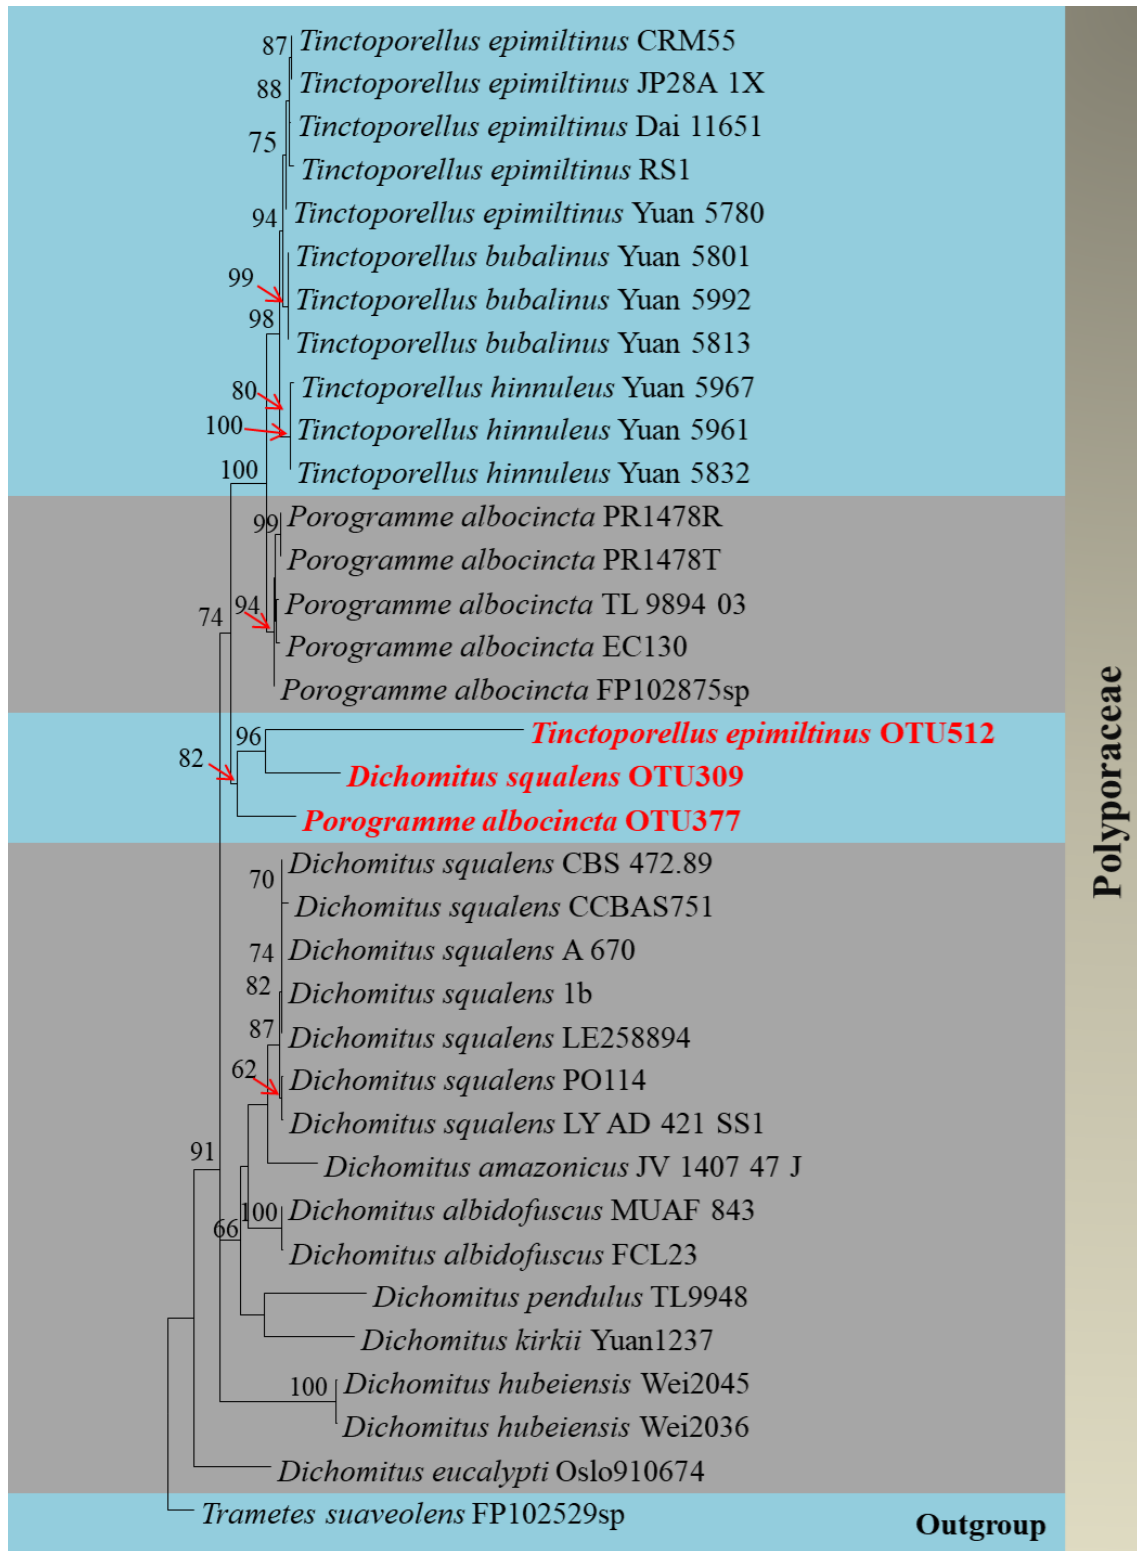

**Figure S14.** Phylograms of *Hymenochaete tongbiguanensis* and *Erythromyces crocicreas* (Agaricomycetes) generated from Randomized Axelerated Maximum Likelihood (RAXML) analysis based on complete internal transcribed spacer (ITS) sequences.

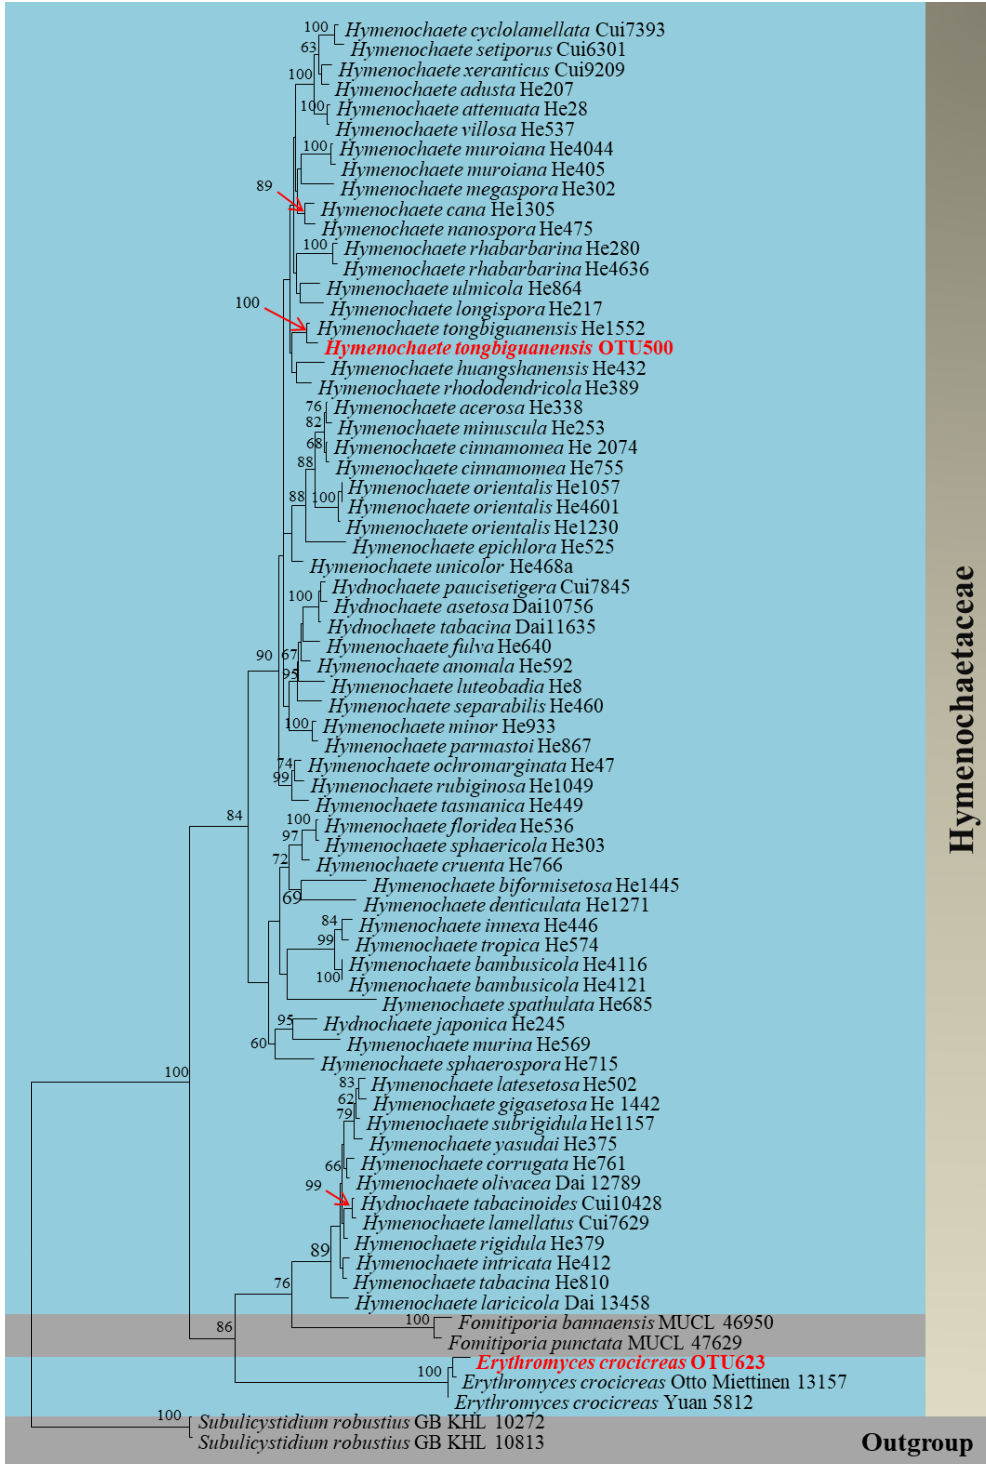

**Figure S15.** Phylograms of *Jianyunia sakaguchii* (Agaricostilbomycetes) generated from Randomized Axelerated Maximum Likelihood (RAxML) analysis based on complete internal transcribed spacer (ITS) sequences.

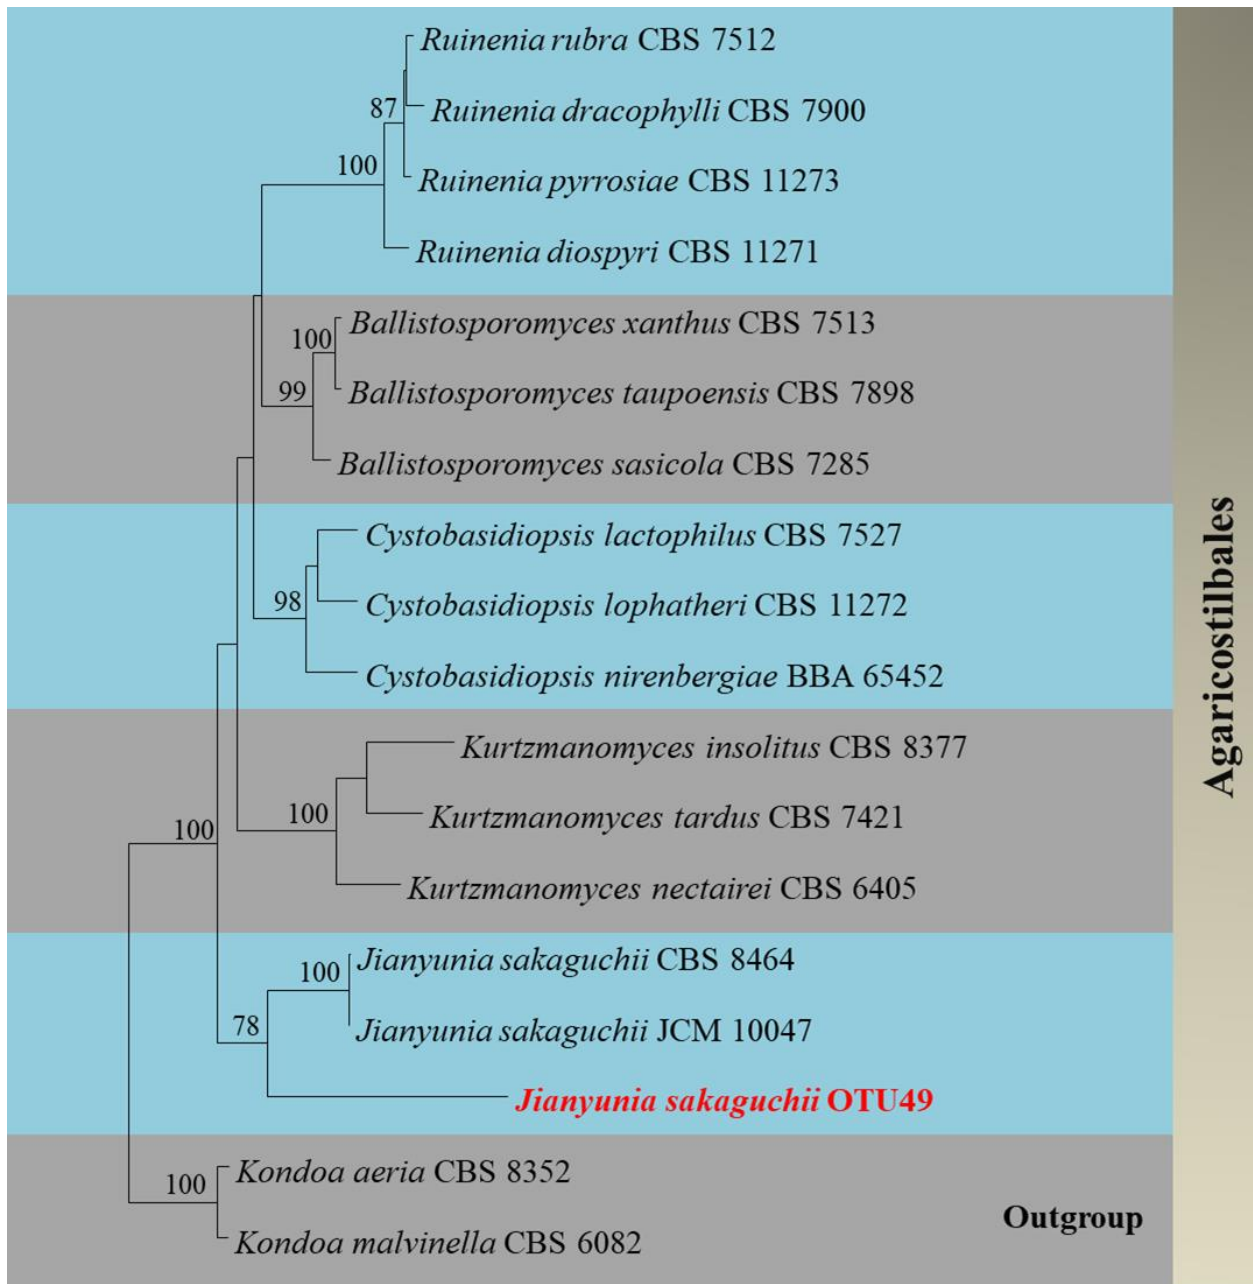

Supplement: Data_Sheet_1.pdf [file Data_Sheet_1.pdf]
